# Supplementary material
Source: MDPI journal article supplement (https://www.mdpi.com/2673-4583/14/1/30)
Supplement: s1 [file s1]

# Transesterification of a natural epoxythymol is favored under alkaline conditions, preserving the enantiomeric purity

Jessica M. Lorenzo-García <sup>1</sup>, Antonio J. Oliveros-Ortiz <sup>1</sup>, Héctor M. Arreaga-González <sup>2</sup>,  
Carlos J. Cortés-García <sup>1</sup>, Rosa E. del Río <sup>1</sup>, Gabriela Rodríguez-García <sup>1</sup> and  
Mario A. Gómez-Hurtado <sup>1,\*</sup>

<sup>1</sup> Instituto de Investigaciones Químico Biológicas, Universidad Michoacana de San Nicolás de Hidalgo, Michoacán 58030, Mexico.

<sup>2</sup> Instituto de Agroindustrias de la Universidad Tecnológica de la Mixteca, Huajuapán de León, Oaxaca, Oaxaca 69000, México

\* mario.gomez@umich.mx

## CONTENTS

**Figure S1.** <sup>1</sup>H NMR spectrum of (+)-(8*S*)-10-Benzoyloxy-6-hydroxy-8,9-epoxythymol isobutyrate (**1**).....S2

**Figure S2.** <sup>13</sup>C NMR spectrum of (+)-(8*S*)-10-Benzoyloxy-6-hydroxy-8,9-epoxythymol isobutyrate (**1**).....S3

**Figure S3.** <sup>1</sup>H NMR spectrum of (8*S*)-10-benzoyloxy-6-isobutiriloxy-8,9-epoxythymol Isobutirato (**2**).....S4

**Figure S4.** Optical purity analysis by <sup>1</sup>H NMR-BINOL methodology of (+)-(8*S*)-10-Benzoyloxy-6-hydroxy-8,9-epoxythymol isobutyrate (**1**).....S5

**Figure S5.** Optical purity analysis by <sup>1</sup>H NMR-BINOL methodology of (8*S*)-10-benzoyloxy-6-isobutiriloxy-8,9-epoxythymol Isobutirato (**2**).....S6

**Figure S6.** Optical purity analysis by <sup>1</sup>H NMR-BINOL methodology of deliberate escalemization of **1**...S7

**Figure S7.** ECD and UV spectrum of **1**.....S8

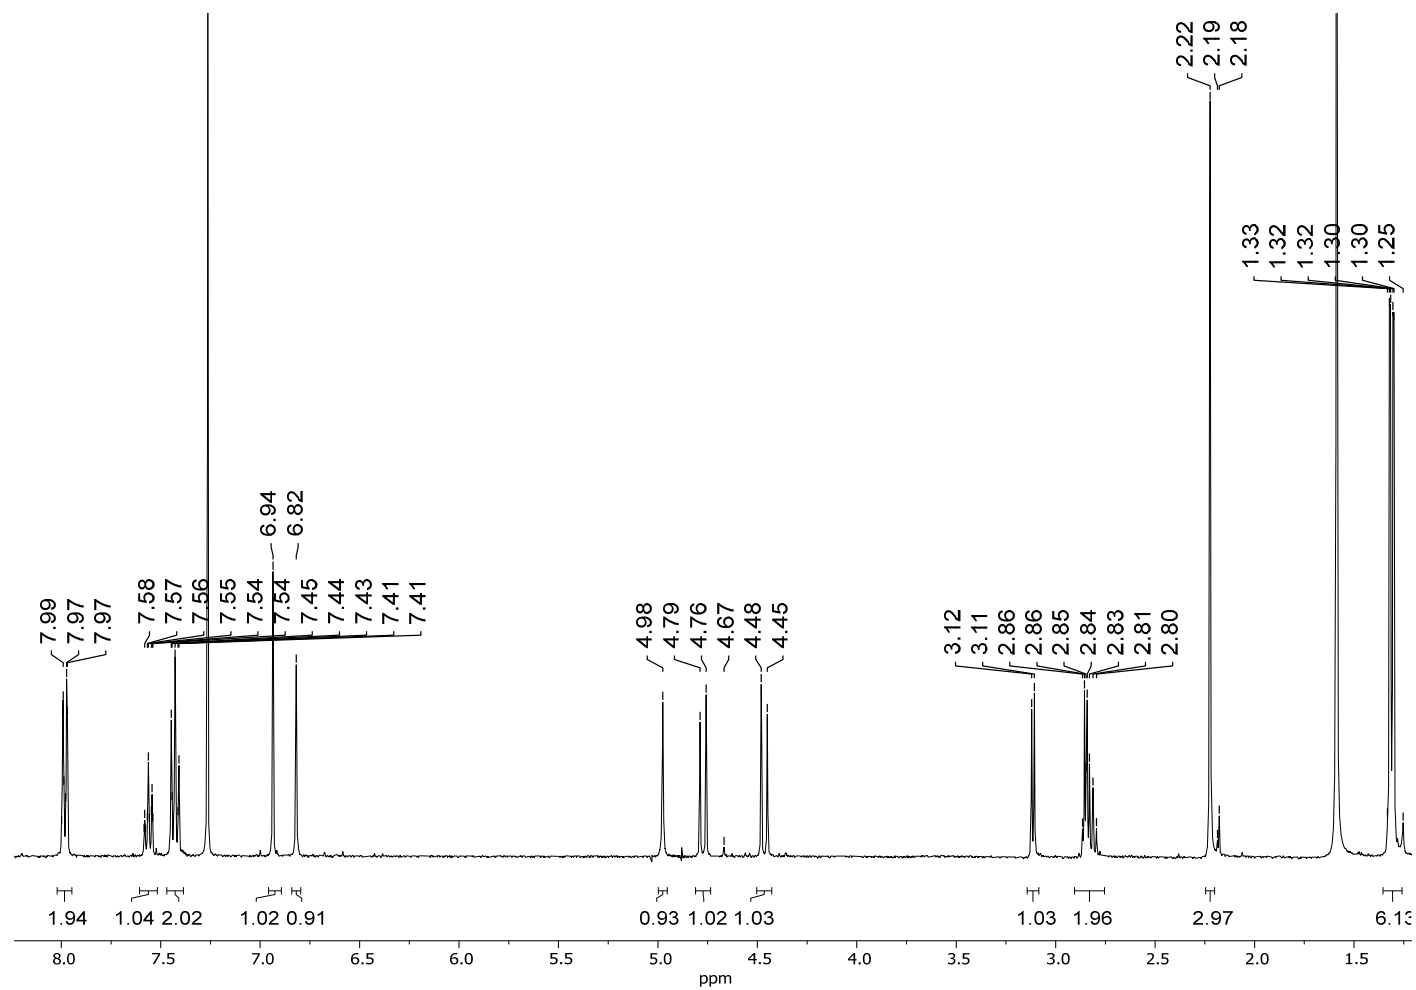

**Figure S1.**  $^1\text{H}$  NMR spectrum of (+)-(8S)-10-Benzoyloxy-6-hydroxy-8,9-epoxythymol isobutyrate (**1**).

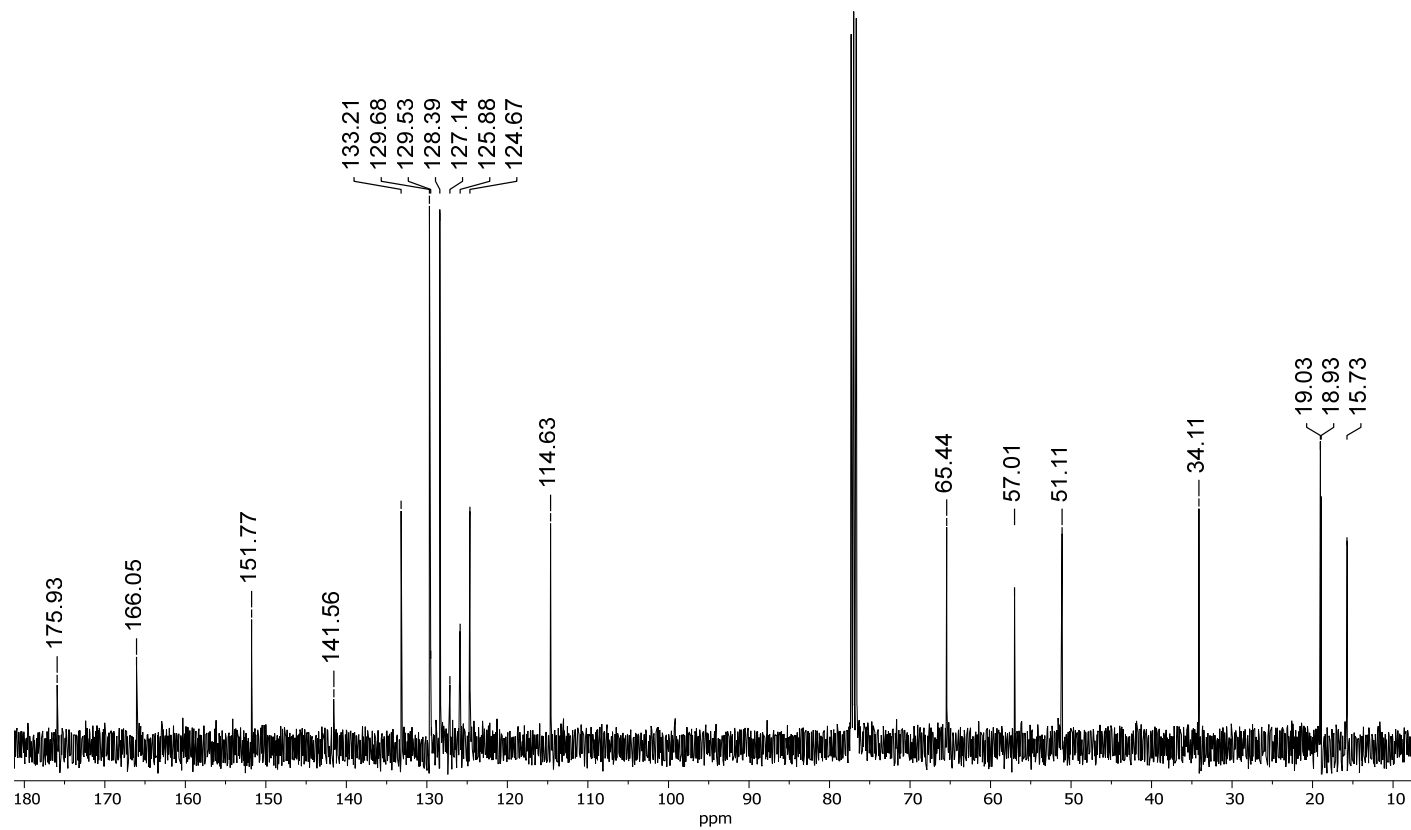

**Figure S2.** <sup>13</sup>C NMR spectrum of (+)-(8S)-10-Benzoyloxy-6-hydroxy-8,9-epoxythymol isobutyrate (**1**).

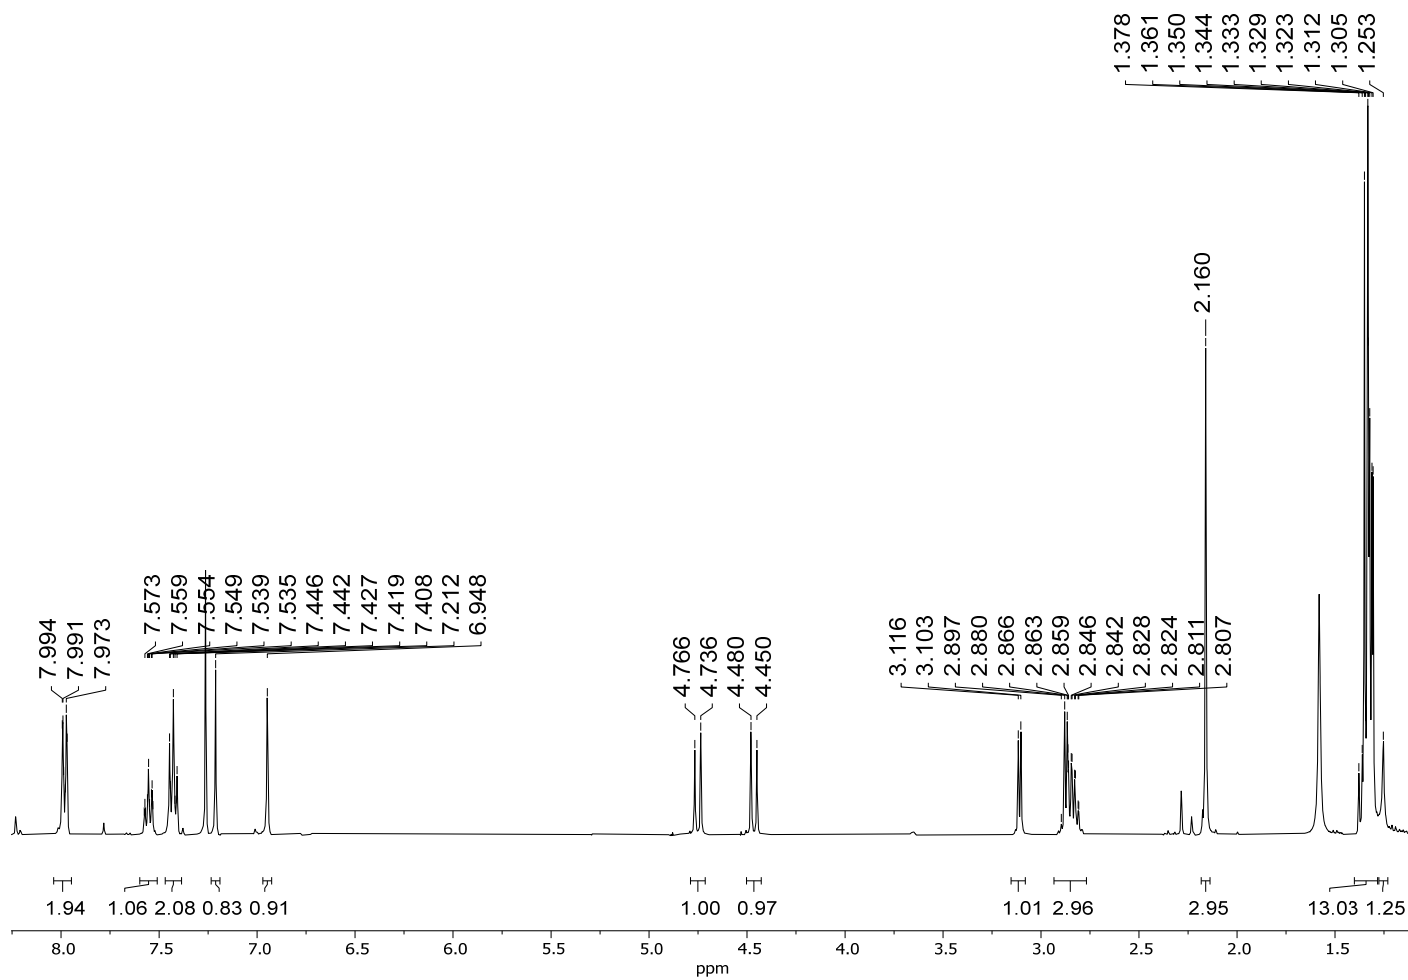

**Figure S3.** <sup>1</sup>H NMR spectrum of (8S)-10-benzoyloxy-6-isobutyryloxy-8,9-epoxithymol isobutyrate (2).

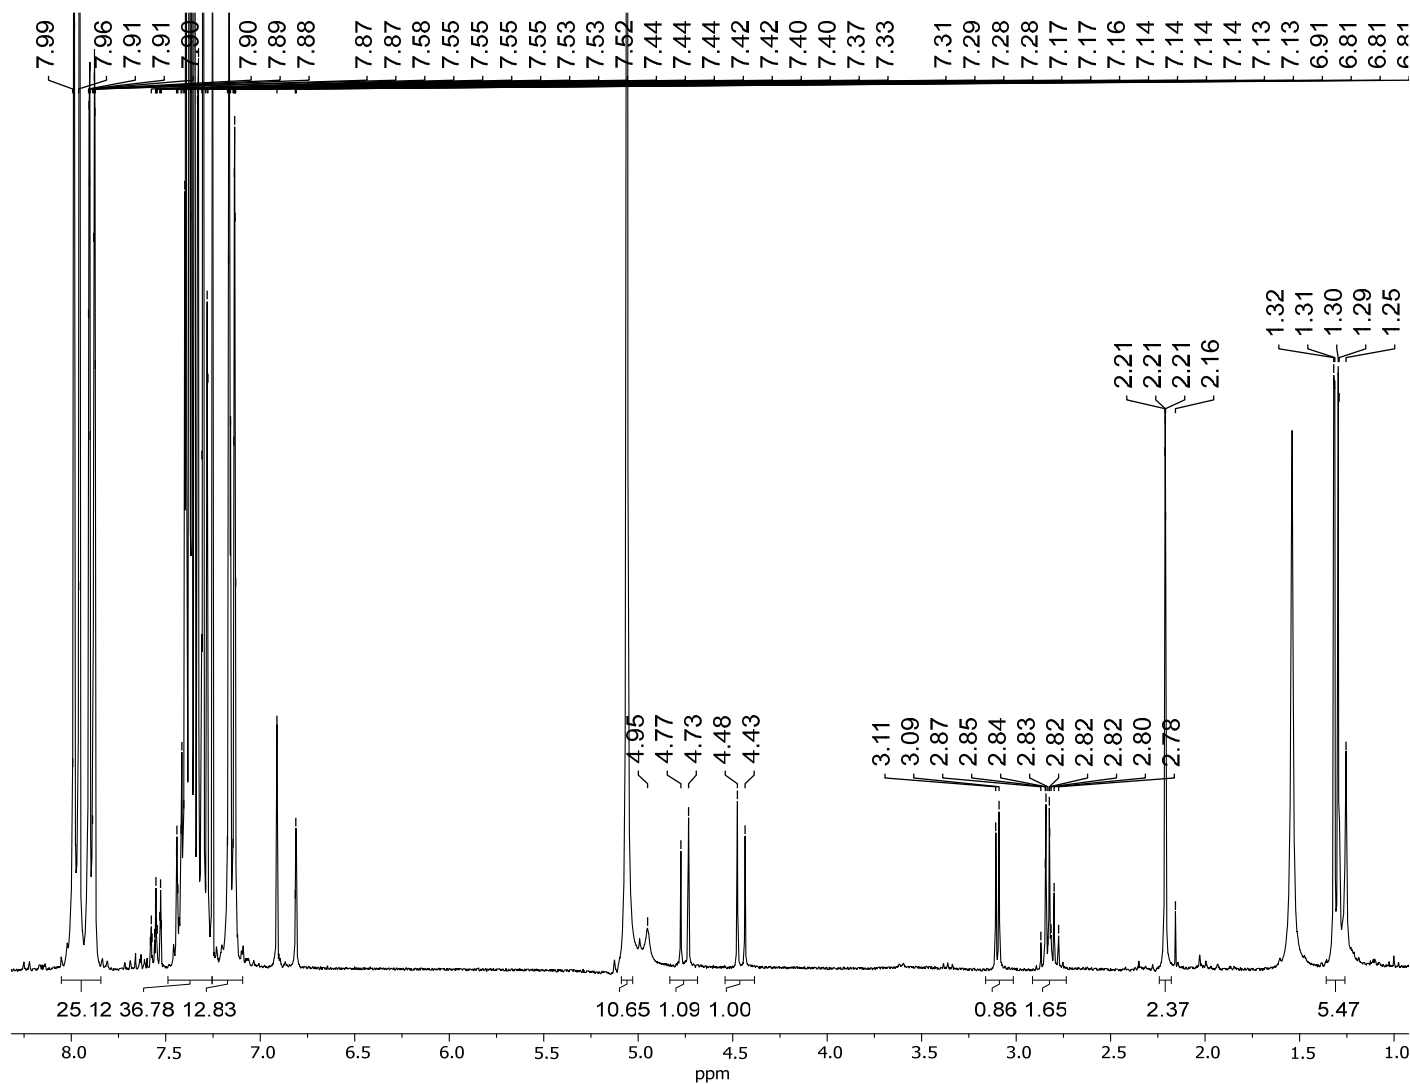

**Figure S4.** Optical purity analysis by  $^1\text{H}$  NMR-BINOL methodology of (+)-(8S)-10-Benzoyloxy-6-hydroxy-8,9-epoxythymol isobutyrate (1).

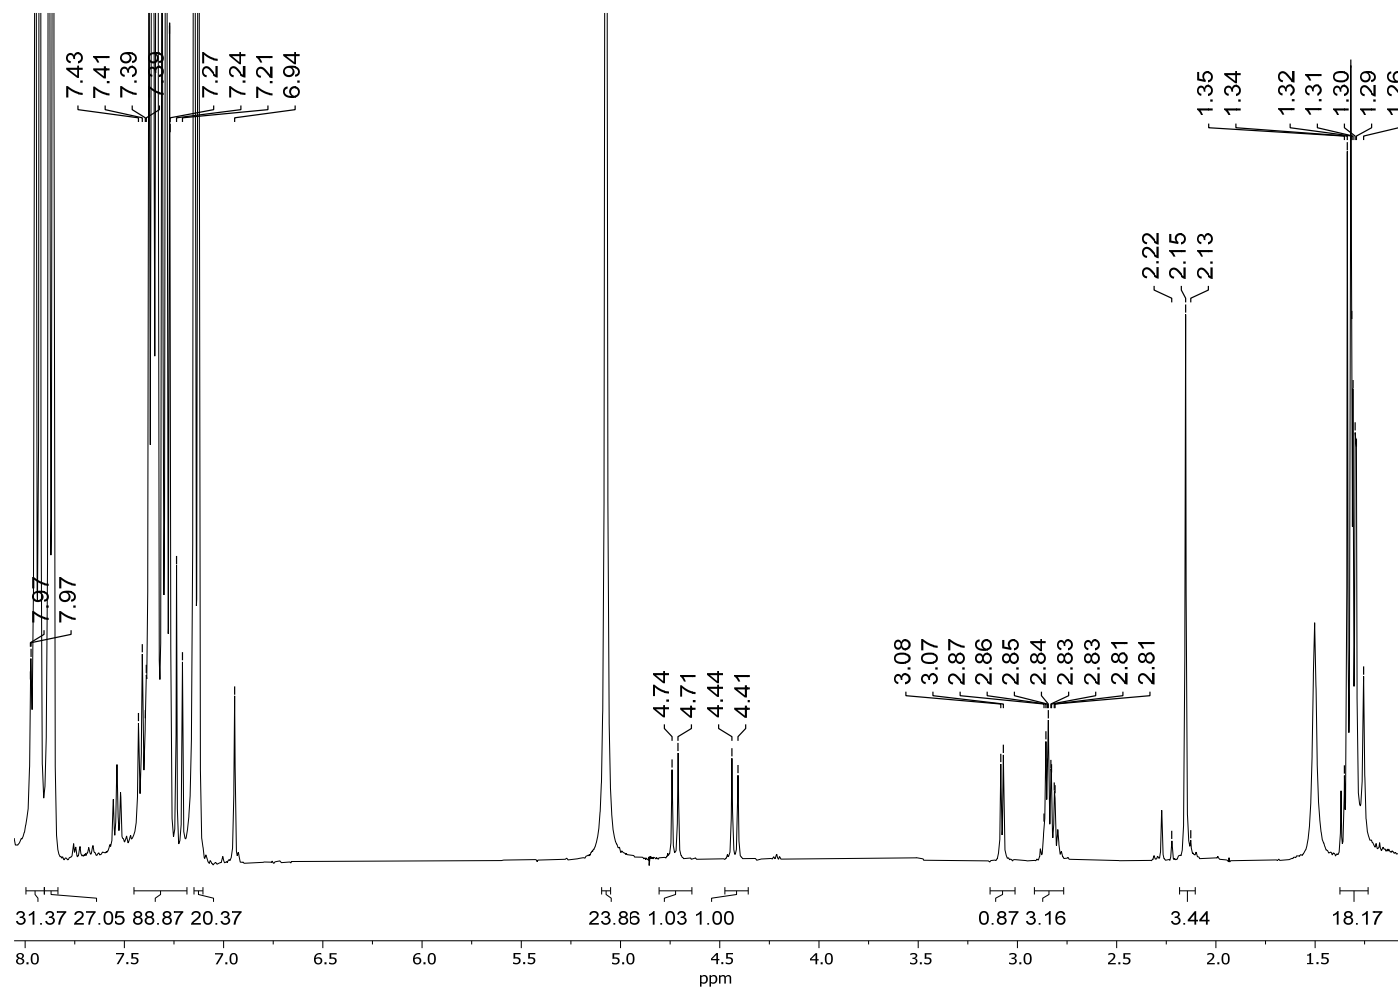

**Figure S5.** Optical purity analysis by  $^1\text{H}$  NMR-BINOL methodology of (8S)-10-benzoyloxy-6-isobutyryloxy-8,9-epoxithymol isobutirate (2).

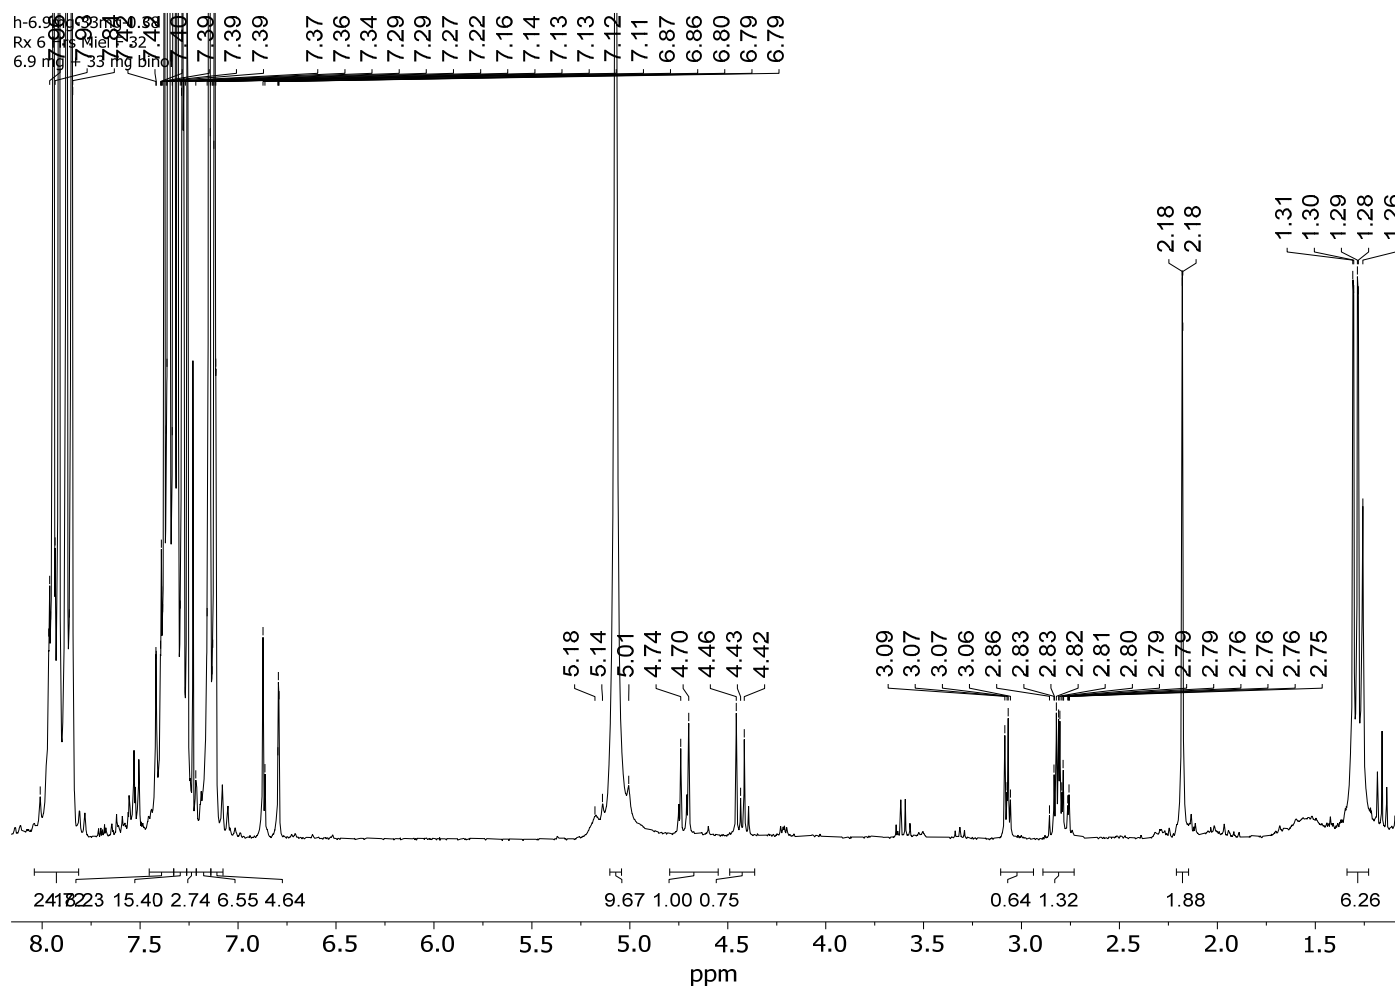

Figure S6. Optical purity analysis by  $^1\text{H}$  NMR-BINOL methodology of deliberate escalemization of **1**.

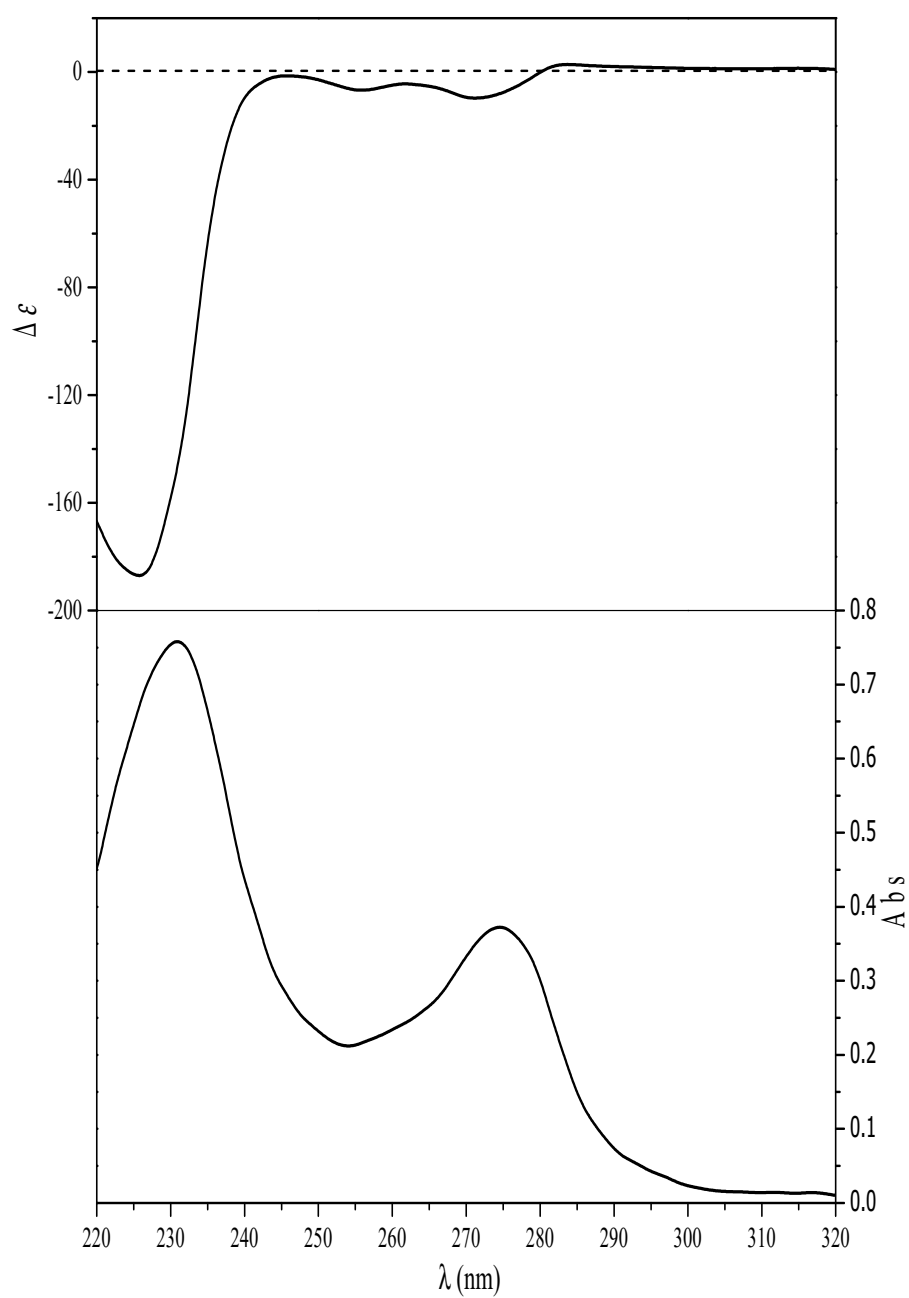

**Figure S7.** ECD and UV spectrum of **1**.
